# Supplementary material for: Decoration of silver nanoparticles on nitrogen-doped nanoporous carbon derived from zeolitic imidazole framework-8 (ZIF-8) via in situ auto-reduction
Source: Royal Society of Chemistry journal article supplement (doi:10.1039/d0ra10546e), 2021-01-01
Supplement: d0ra10546e1.pdf [file d0ra10546e1.pdf]

# Decoration of silver nanoparticles on nitrogen-doped nanoporous carbon derived from zeolitic imidazole framework-8 (ZIF-8) via *in situ* auto-reduction

Vediyappan Veeramani,<sup>a</sup> Nguyen Van Chi,<sup>b\*</sup> Yi-Lin Yang,<sup>a</sup> Nguyen Thi Hong Huong,<sup>c</sup> Thuan Van Tran<sup>d</sup>, Tansir Ahamad,<sup>e</sup> Saad M Alshehri,<sup>e</sup> and Kevin C.-W. Wu<sup>a\*</sup>

<sup>a</sup> Department of Chemical Engineering, National Taiwan University. No. 1, Sec. 4, Roosevelt Road, Taipei 10617, Taiwan.

<sup>b</sup> Institute of Applied Science and Technology, Van Lang University, Ho Chi Minh 700000, Vietnam.

<sup>c</sup> Faculty of Medicine and Pharmacy, Van Lang University, Ho Chi Minh 700000, Vietnam

<sup>d</sup> NTT Hi-Tech Institute, Nguyen Tat Thanh University, Ho Chi Minh 755414, Vietnam

<sup>e</sup> Department of Chemistry, College of Science, King Saud University, P.O. Box 2455, Riyadh 11451, Saudi Arabia

\* E-mail: [kevinwu@ntu.edu.tw](mailto:kevinwu@ntu.edu.tw) (Kevin Wu)

[chi.nv@vlu.edu.vn](mailto:chi.nv@vlu.edu.vn) (N.V. Chi)

## Experimental section

### Chemicals

2-Methylimidazole (2-MIM), zinc nitrate hexahydrate ( $\text{Zn}(\text{NO}_3)_2 \cdot 6\text{H}_2\text{O}$ ), Silver nitrate ( $\text{AgNO}_3$ ), sodium borohydride ( $\text{NaBH}_4$ ) and methanol anhydrous were purchased from Sigma–Aldrich and were used without further purification. Polyvinylpyrrolidone (PVP) were purchased from TCI chemicals. 4-nitrophenol (4-NP) were purchased from Acros. Deionized water was purified with a Milli-Q system (Millipore, Bedford, MA, USA).

### Synthesis procedure for nitrogen-enriched nanoporous carbon (NC)

The nitrogen-enriched nanoporous carbon (NC) were synthesized from the previous literature.<sup>1</sup> Briefly, the polyvinylpyrrolidone (12 g) and 2-methylimidazole (4.2 g) was dissolved in 150 mL methanol solution and  $\text{Zn}(\text{NO}_3)_2 \cdot 6\text{H}_2\text{O}$  (4.4 g) was dissolved in an another 150 mL methanol solution. The two solutions are magnetic stirrer for 10 min with separately. Subsequently, the zinc contains solution added into the 2-methylimidazole solution and stirring for another 1 h. After 24 h aging, the white sediment was centrifuged and washed with methanol solution. Finally, the white powder was dried in the vacuum at RT for 24 h. Furthermore, the ZIF-8 powder was carbonized by a tubular furnace at 900 °C for 8 h under  $\text{N}_2$  atmosphere with a heating rate of 5 °C  $\text{min}^{-1}$ . The as-synthesized carbon samples were labelled as Zn@NC.

### Synthesis of Ag NPs on the nanoporous carbon by auto-reduction method (Ag@NC)

For the synthesis of Ag@NC nanocomposites, 0.1 g of Zn@NC was dissolved in 30 mL of water. (notes: Zn@NC sample was used immediately after take out of the tubular to prevent the oxidation of Zn into ZnO). Further, the silver nitrate (2 mL; 0.1 M) solution directly added to above solution and stirred for 3 h at room temperature. After that, the black powder was washed by centrifugation using DI water and methanol solution. Finally, the sample was dried under vacuum for 1 day and labelled as Ag@NC.

By the same way, we also tried to the synthesis of Ag@NCW (NCW is nitrogen-doped carbon after washing by HCl), however, the Ag NPs could not form on the nanoporous carbon (**Fig. S2A**).

### **Synthesis of Ag/NC catalyst by impregnation method**

The silver nitrate (2 mL; 0.1 M) solution was directly added to 30 mL solution containing NC sample (0.1 g) and stirred for 0.5 h at room temperature. After that, NaBH<sub>4</sub> (5 mL, 1 mmol) was dropped into the above solution, keep stirring in 1 h. The resulting solid was collected by centrifugation and washed with DI water and methanol solution. The obtained solid was dried under vacuum for 1 day and labelled as Ag/NC-SB, where SB is sodium borohydride.

### **Characterizations**

The crystal structure of the samples was analyzed using powder X-ray diffraction (XRD - Rigaku-Ultima IV instrument) patterns. The morphology of the samples was monitored by scanning/transmission (SEM/TEM) electron microscopy (SEM, NovaTM NanoSEM 230; TEM, JEOL JEM-1200EX II). The internal surface area and pore size of the as-synthesized samples were determined using N<sub>2</sub>-adsorption/desorption measurement (micromeritics ASAP 2020). The material compositions were recorded by X-ray photoelectron spectroscopy (XPS, Thermo Scientific, Theta Probe). The present weight percentage of material composition was analyzed by inductively coupled plasma-optical emission spectrometry (ICP-OES).

### **Catalytic reaction of 4-NP**

To investigate the catalytic ability and reusability of Ag@NC nanocomposite using for hydrogenation reaction of 4-NP. Typically, the 4-NP ( $1 \times 10^{-4}$  M, 20 mL) and NaBH<sub>4</sub> (0.5 M, 5 mL) solutions were mixed together, then stir for 20 min to forming the 4-nitrophenolate ion. After that, Ag@NC catalyst (1 mg) was added to the above mixture, which was designated at a time ( $t_0$ ) and stirrer in the room temperature. During these time periods, withdrawing 1.5 mL of the reaction mixture at every 2 min and monitored by using a UV-Vis spectroscopy (Jasco V-670 at a wavelength of 400 nm).

## Results

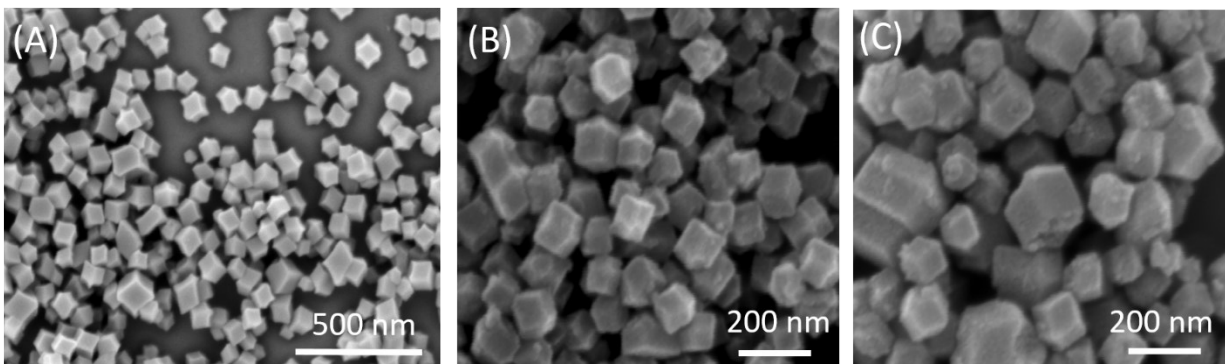

**Fig. S1** SEM images of ZIF-8 (A), Zn@NC (B) and Ag@NC (C) samples.

**Table S1:** Metal content in synthesized samples results

| Sample | Ag (wt.%) | Zn (wt.%) |
|--------|-----------|-----------|
| Zn@NC  | -         | 33.6      |
| Ag@NC  | 8.46      | 10.5      |
| NCW    | -         | 8.2       |
| Ag@NCW | -         | 6.3       |

NCW: nitrogen-doped carbon after washed by HCl concentrate

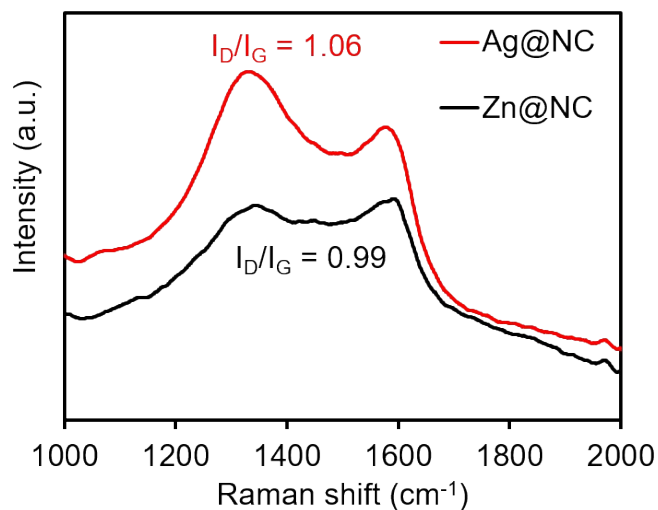

**Fig. S2:** Raman spectra of the synthesized samples

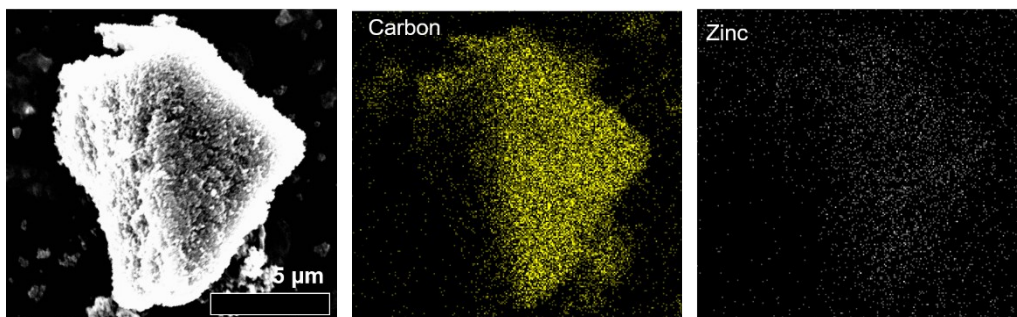

**Fig. S3:** SEM mapping of Zn@NC revealed the distribution of Zn in the NC.

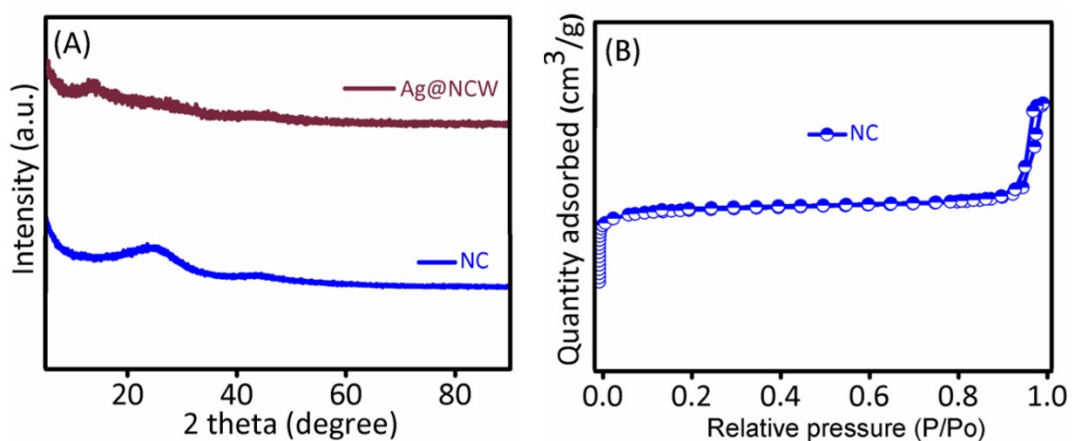

**Fig. S4:** (A) XRD pattern for ZIF-8-derived NC and Ag@NCW (NCW: nitrogen-doped carbon was washed by HCl to remove Zn residual), (B) N<sub>2</sub> adsorption/desorption analysis for NC samples.

**Table S2.** Pore characteristics of ZIF-8 and its composite materials.

| Sample | Specific surface area<br>(m <sup>2</sup> g <sup>-1</sup> ) | Total pore volume<br>(cm <sup>3</sup> g <sup>-1</sup> ) | Pore size<br>(nm) |
|--------|------------------------------------------------------------|---------------------------------------------------------|-------------------|
| ZIF-8  | 1398.9                                                     | 0.92                                                    | 1.5               |
| NC     | 807.9                                                      | 1.1                                                     | 0.9               |
| Zn@NC  | 792.5                                                      | 0.91                                                    | 0.8               |
| Ag@NC  | 534.9                                                      | 0.57                                                    | 0.8               |

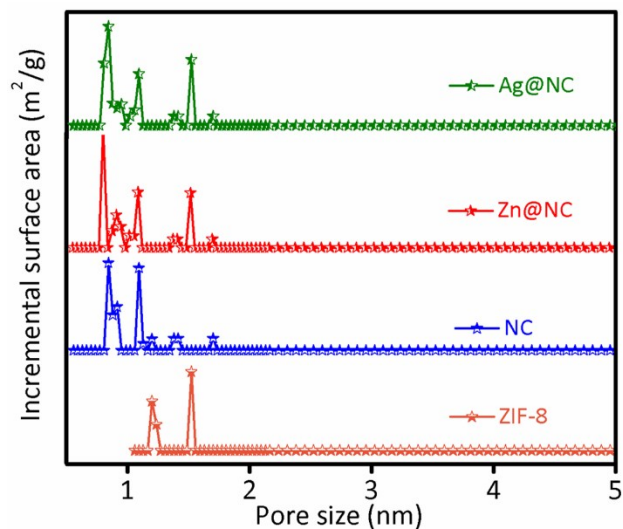

**Fig. S5:** Pore-size distribution of ZIF-8, NC, Zn@NC and Ag@NC samples. Notes: Porosity distributions were calculated by Density Functional Theory using Non-Negative Regularization methods.

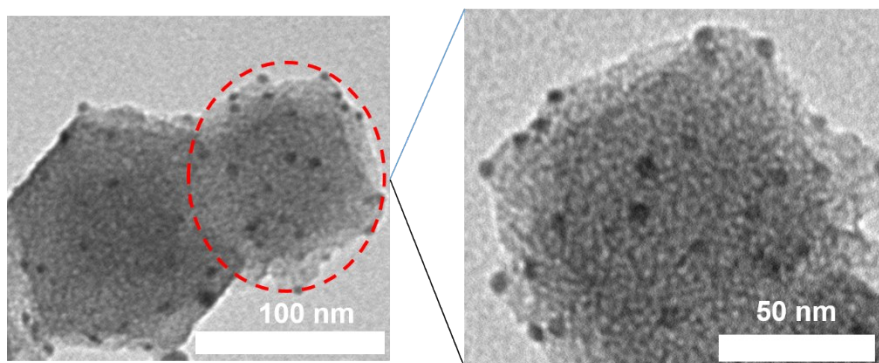

**Fig. S6:** High resolution TEM of Ag@NC revealed that the Ag NPs confined inside the NC.

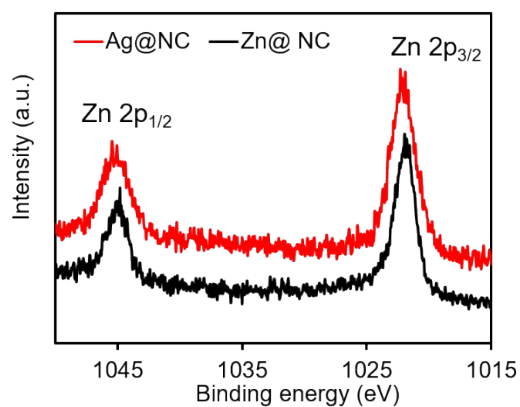

**Figure S7:** XPS spectrum of Zn in the samples.

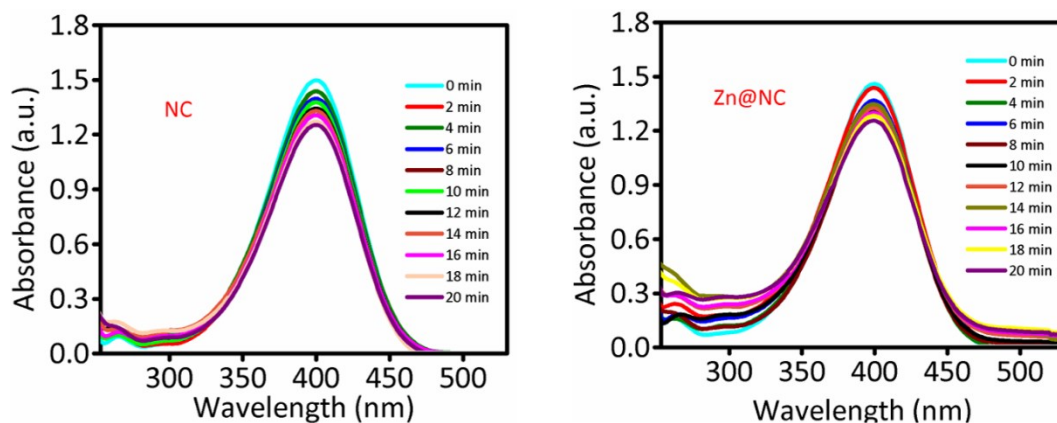

**Fig. S8** (A and B) UV-vis spectra of 4-nitrophenol reduction recorded in every 2 min using NC and Zn@NC catalyst, respectively.

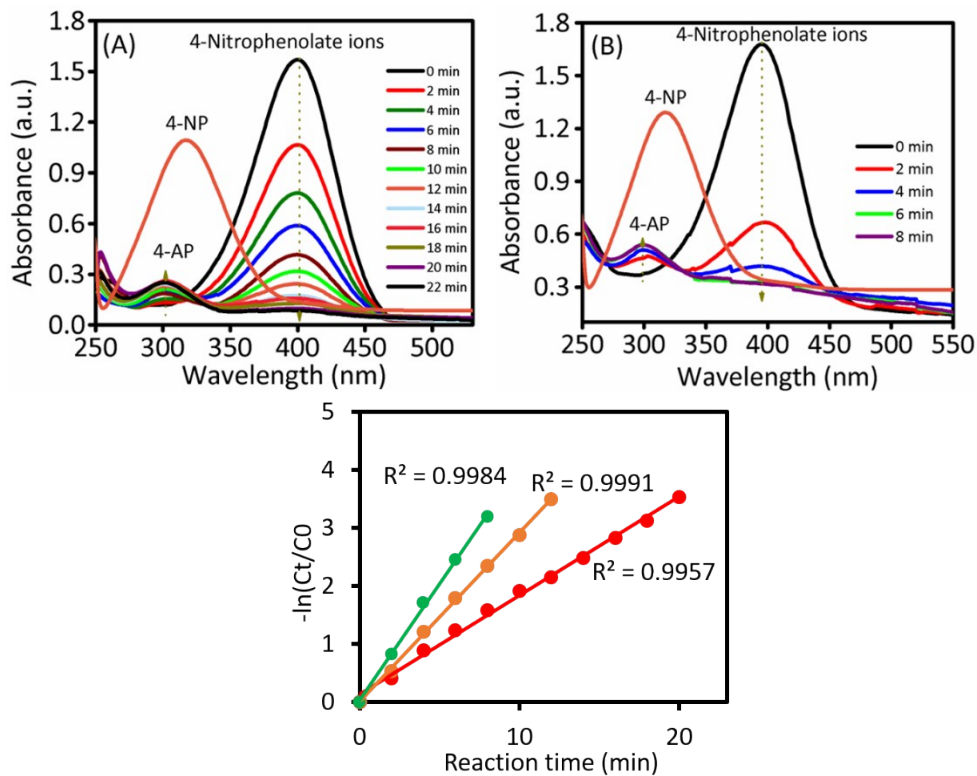

**Fig. S9** (A and B) UV-vis spectra of 4-nitrophenol reduction recorded at every 2 min using different amount Ag@NC (0.5 mg) and Ag@NC (1.5 mg) catalyst respectively. (C) The relationship of  $\ln(C_t/C_0)$  versus reaction time for the reduction of 4-NP from 4-NP using Ag@NC (0.5, 1.0 and 1.5 mg) catalyst.

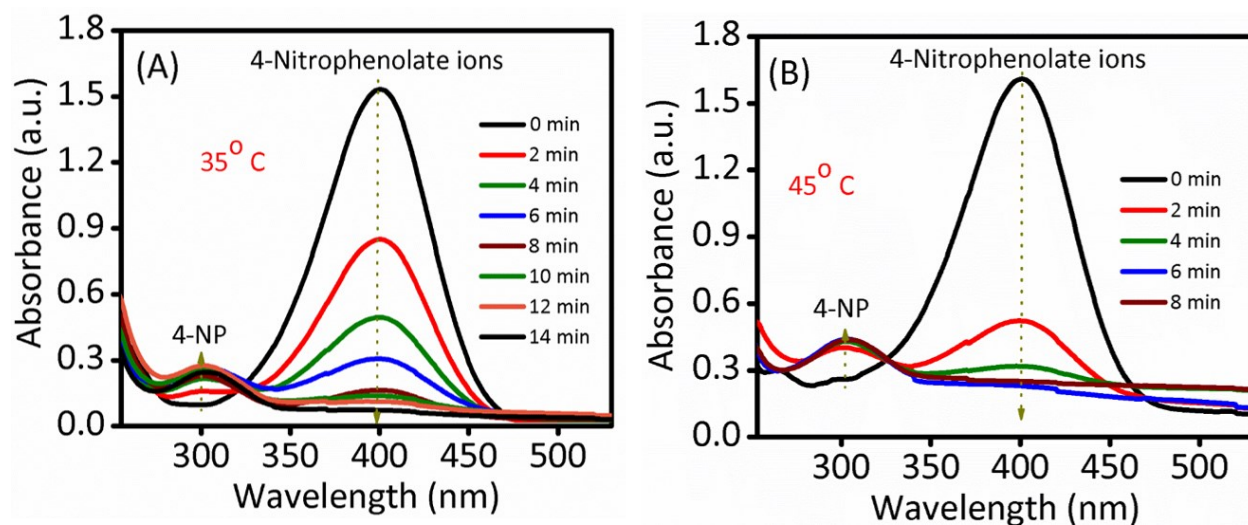

**Fig. S10** UV-vis spectra of 4-nitrophenol reduction recorded in every 2 min using Ag@NC (1.0 mg) catalyst at 35°C (A), and 45°C (B) temperatures.

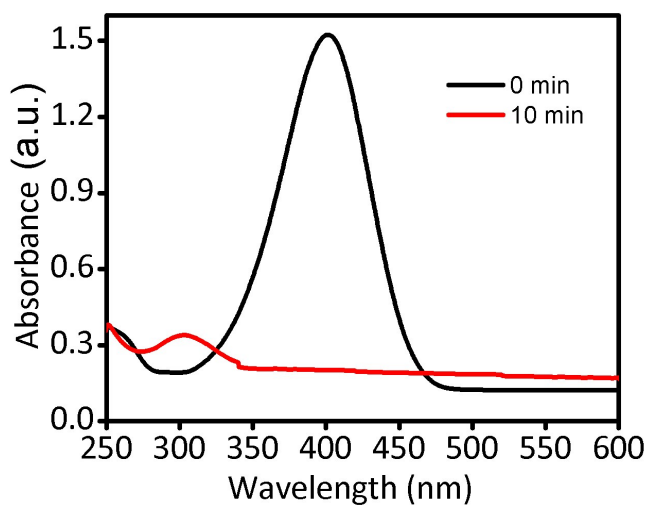

**Fig. S11** UV-vis spectra of 4-nitrophenol reduction recorded using Ag@NC-SB (1.5 mg).



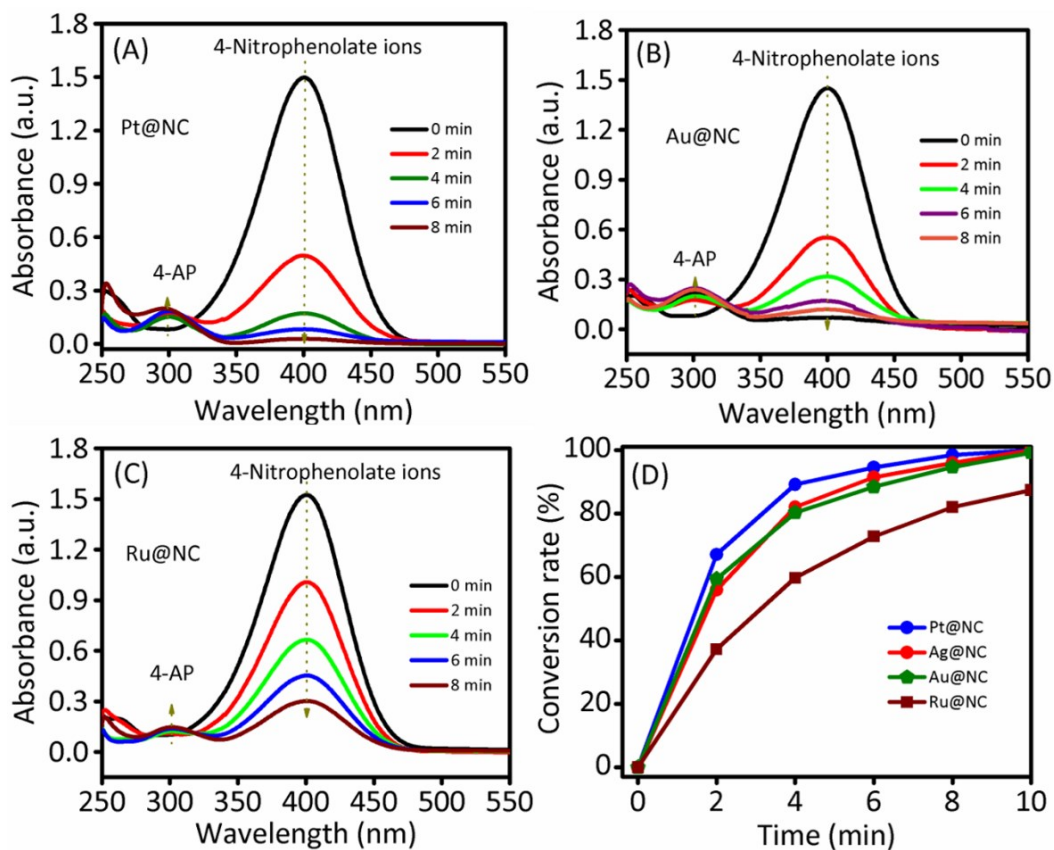

**Fig. S12** (A-C) UV-vis spectra of 4-nitrophenol reduction recorded in every 2 min using Pt@NC (1.5 mg), Au@NC (1.5 mg), and Ru@NC (1.5 mg) catalyst. (D) Catalytic conversion of 4-AP from 4-NP at different catalysts.

**Table S3:** Comparison of catalytic activity of various nanostructured catalysts

| Catalysts        | Reaction rate constants *10 <sup>-3</sup> (s <sup>-1</sup> ) | Ref.      |
|------------------|--------------------------------------------------------------|-----------|
| Ag@NC            | 4.2                                                          | This work |
| Ag/r-GO          | 0.45                                                         | 2         |
| Ag/Carbon sphere | 1.69                                                         | 3         |
| Ag-1/CMK-3       | 5.33                                                         | 4         |
| Ag/CNF           | 6.2                                                          | 5         |



|        |     |   |
|--------|-----|---|
| Au/C   | 0.3 | 6 |
| Au/NC  | 3.5 | 6 |
| Pt-SPB | 4.4 | 7 |

---

## Reference

1. C. Van Nguyen, Y.-T. Liao, T.-C. Kang, J. E. Chen, T. Yoshikawa, Y. Nakasaka, T. Masuda and K. C.-W. Wu, *Green Chem.*, 2016, **18**, 5957-5961.
2. T. V. Thu, P. J. Ko, N. H. H. Phuc and A. Sandhu, *Journal of nanoparticle research*, 2013, **15**, 1975.
3. S. Tang, S. Vongehr and X. Meng, *J. Phys. Chem. C*, 2010, **114**, 977-982.
4. Y. Chi, L. Zhao, Q. Yuan, X. Yan, Y. Li, N. Li and X. Li, *J. Mater. Chem. A*, 2012, **22**, 13571-13577.
5. P. Zhang, C. Shao, Z. Zhang, M. Zhang, J. Mu, Z. Guo and Y. Liu, *Nanoscale*, 2011, **3**, 3357-3363.
6. Y. T. Liao, J. E. Chen, Y. Isida, T. Yonezawa, W. C. Chang, S. M. Alshehri, Y. Yamauchi and K. C. W. Wu, *ChemCatChem*, 2016, **8**, 502-509.
7. Y. Mei, Y. Lu, F. Polzer, M. Ballauff and M. Drechsler, *Chem. Mater.*, 2007, **19**, 1062-1069.
